# Supplementary material
Source: publisher site journal article supplement (https://static.cambridge.org/content/id/urn:cambridge.org:id:article:S0145553220000267/resource/name/S0145553220000267supp001.docx)
Supplement: Supplementary file 1 [file S0145553220000267supp001.docx]

**TABLE A1.** *Most common occupations among antebellum artisans.*

|  | *Occupation* | *Percentage* |  | *Occupation* | *Percentage* |
| --- | --- | --- | --- | --- | --- |
| 1 | Maker | 0.163 | 35 | Dyer | 0.002 |
| 2 | Carpenter | 0.111 | 36 | Finisher | 0.002 |
| 3 | Builder | 0.089 | 37 | Gilder | 0.002 |
| 4 | Smith | 0.084 | 38 | Trimmer | 0.002 |
| 5 | Wright | 0.083 | 39 | Wool sorter | 0.002 |
| 6 | Tanner | 0.067 | 40 | Carder | 0.001 |
| 7 | Machinist | 0.065 | 41 | Carver | 0.001 |
| 8 | Mason | 0.037 | 42 | Corder | 0.001 |
| 9 | Miller | 0.030 | 43 | Hanger | 0.001 |
| 10 | Engineer | 0.029 | 44 | Nailer | 0.001 |
| 11 | Hatter | 0.025 | 45 | Packer | 0.001 |
| 12 | Painter | 0.024 | 46 | Plasterer | 0.001 |
| 13 | Cutter | 0.022 | 47 | Plater | 0.001 |
| 14 | Printer | 0.022 | 48 | Upholsterer | 0.001 |
| 15 | Butcher | 0.020 | 49 | Boiler | 0.001 |
| 16 | Cooper | 0.019 | 50 | Brewer | 0.001 |
| 17 | Tailor | 0.017 | 51 | Burner | 0.001 |
| 18 | Currier | 0.017 | 52 | Clicker | 0.001 |
| 19 | Baker | 0.014 | 53 | Cobbler | 0.001 |
| 20 | Contractor | 0.011 | 54 | Colorer | 0.001 |
| 21 | Joiner | 0.010 | 55 | Crimper | 0.001 |
| 22 | Jeweler | 0.010 | 56 | Engine builder | 0.001 |
| 23 | Foundry man | 0.009 | 57 | Fuller | 0.001 |
| 24 | Cordwainer | 0.008 | 58 | Furnace man | 0.001 |
| 25 | Distiller | 0.007 | 59 | Glassworker | 0.001 |
| 26 | Dresser | 0.006 | 60 | Goldbeater | 0.001 |
| 27 | Potter | 0.006 | 61 | Moulder | 0.001 |
| 28 | Caulker | 0.005 | 62 | Sawyer | 0.001 |
| 29 | Tallow chandler | 0.005 | 63 | Textile Worker | 0.001 |
| 30 | Armorer | 0.003 | 64 | Turner | 0.001 |
| 31 | Binder | 0.003 | 65 | Warper | 0.001 |
| 32 | Saddler | 0.003 | 66 | Weaver | 0.001 |
| 33 | Graver | 0.003 | 67 | Iron Master | 0.0001 |
| 34 | Bricklayer | 0.002 | 68 | Stapler | 0.0001 |

Notes:N = 1,752. Occupations are not mutually exclusive. These occupational categories are themselves summaries of more detailed descriptions. E.g., “maker” includes block makers, bonnet makers, boot makers, box makers, brick makers, and so on.

**TABLE A2.** *Most common occupations among antebellum manufacturers and merchants.*

|  | *Occupation* | *Percentage* |  | *Occupation* | *Percentage* |
| --- | --- | --- | --- | --- | --- |
| 1 | Other manufacturer | 0.355 | 1 | Merchant | 0.812 |
| 2 | Boot and shoes | 0.242 | 2 | Dealer | 0.073 |
| 3 | Shipbuilder | 0.058 | 3 | Trader | 0.059 |
| 4 | Cotton | 0.042 | 4 | Lumber | 0.031 |
| 5 | Wool | 0.040 | 5 | Dry goods | 0.016 |
| 6 | Iron | 0.035 | 6 | Real estate | 0.015 |
| 7 | Paper | 0.033 | 7 | Importer | 0.011 |
| 8 | Chairs and Furniture | 0.022 | 8 | Auctioneer | 0.010 |
| 9 | Clothier | 0.021 | 9 | Broker | 0.004 |
| 10 | Metal Founder | 0.014 | 10 | Ship chandler | 0.004 |
| 11 | Sawmill | 0.014 | 11 | Lumber | 0.004 |
| 12 | Scythes | 0.011 | 12 | Speculator | 0.003 |
| 13 | Foundry | 0.009 | 13 | Supercargo | 0.002 |
| 14 | Leather | 0.009 | 14 | Business | 0.002 |
| 15 | Gristmill | 0.009 | 15 | Shipping Owner | 0.002 |
| 16 | Other mill | 0.007 | 16 | Boots and shoes | 0.002 |
| 17 | Soap | 0.006 | 17 | Exporter | 0.001 |
| 18 | Yarn and Twine | 0.003 | 18 | Jobber | 0.001 |
| 19 | Quarry | 0.003 | 19 | Shipper | 0.001 |
| 20 | Furnace | 0.002 | 20 | Victualler | 0.001 |
| 21 | Forge | 0.002 | 21 | Whale chandler | 0.001 |
| 22 | Refiner | 0.002 | 22 | Grain and flour | 0.001 |
| 23 | Fulling mill | 0.002 |  |  |  |
| 24 | Gas | 0.001 |  |  |  |
| 25 | Mining | 0.001 |  |  |  |

Notes:Numbers are for 1,159 manufacturers and 1,952 merchants. Note that there is significant diversity among “other manufacturer,” including a shuttle manufacturer, a silk manufacturer, a sleigh manufacturer, a snuff manufacturer, and a sword manufacturer. Merchants, however, overwhelmingly described themselves without specialization in any commodities.

**TABLE A3.** *Most common occupations among antebellum service and retail workers and lower management.*

|  | *Occupation* | *Percentage* |  | *Occupation* | *Percentage* |
| --- | --- | --- | --- | --- | --- |
| 1 | Innkeeper | 0.412 | 1 | Clerk | 0.414 |
| 2 | Storekeeper | 0.179 | 2 | Agent | 0.159 |
| 3 | Grocer | 0.148 | 3 | Bookkeeper | 0.117 |
| 4 | Publican | 0.119 | 4 | Superintendent | 0.083 |
| 5 | Seller | 0.063 | 5 | Overseer | 0.055 |
| 6 | Country store | 0.017 | 6 | Accountant | 0.048 |
| 7 | Stagecoaches | 0.011 | 7 | Foreman | 0.021 |
| 8 | Marketman | 0.011 | 8 | Station agent | 0.021 |
| 9 | Stable keeper | 0.011 | 9 | Bank clerk | 0.014 |
| 10 | Stationer | 0.011 | 10 | Notary | 0.014 |
| 11 | Hardware | 0.009 | 11 | Registrar | 0.014 |
| 12 | Peddler | 0.009 | 12 | Reporter | 0.014 |
| 13 | Retail | 0.009 | 13 | Secretary | 0.014 |
| 14 | Tobacconist | 0.009 | 14 | Forwarding agent | 0.014 |
| 15 | Undertaker | 0.009 | 15 | Depot master | 0.007 |
| 16 | Salesman | 0.006 | 16 | Administration | 0.007 |
| 17 | Stone ware | 0.003 | 17 | Station master | 0.007 |
| 18 | Stage livery | 0.003 |  |  |  |
| 19 | Watches | 0.003 |  |  |  |

Notes: There are 352 members of the service and retail interest and 145 members of lower management.

**TABLE A4.** *Most and least ethnic surnames in antebellum sample as ranked by Bayes’s theorem.*

|  | *Least Irish* | *Most Irish* | *Least Scottish* | *Most Scottish* | *Least English* | *Most English* |
| --- | --- | --- | --- | --- | --- | --- |
| 1 | Dunham | Fennelly | Merrill | Mair | Doty | Barnicoat |
| 2 | Whitman | Browne | Pomeroy | Meldrum | Hoyt | Swinnerton |
| 3 | Osborn | Egan | Griswold | McKenzie | Folsom | Hunking |
| 4 | Barrows | Healy | Cheney | Scollay | Wolcott | Dench |
| 5 | Pease | Duggan | Morse | Ruthven | Kellogg | Davies |
| 6 | Luce | Maguire | Whitaker | Moar | Blaisdell | Hopkinson |
| 7 | Dodge | McCarthy | Miner | Leggate | Conklin | Scammell |
| 8 | Coffin | Devereux | Osgood | Thomson | Durfee | Lamprell |
| 9 | Newcomb | Canning | Wilder | Brackenridge | Whittier | Bagnall |
| 10 | Fisk | Higginson | Stacy | McLellan | Shumway | Firth |
| 11 | Myrick | Keating | Lyman | Melville | Swett | Chaloner |
| 12 | Paddock | Carew | Clapp | Ritchie | Dunlap | Rayner |
| 13 | Fitch | Bedlow | Hines | Ballantine | Chapin | Southgate |
| 14 | Hathaway | Fowley | Taft | Salmond | Estes | Hinks |
| 15 | Wing | Ballantine | Cooley | McKay | Farnum | Punchard |
| 16 | Fellows | Tyrrell | Hubbard | Manson | Kimball | Collingwood |
| 17 | Pool | Kenny | Sawyer | Hay | Ingalls | Silvester |
| 18 | Howland | Martyn | Ware | Forbes | Marble | Druce |
| 19 | Hager | Boott | Longley | Forrester | Loomis | Symons |
| 20 | Cobb | Joyce | Briant | Napier | Thurber | Wyles |
| 21 | Root | Mullin | Ranney | Selkirk | Myrick | Dowse |
| 22 | Knowlton | Rossiter | Dudley | Borland | Slocum | Pearse |
| 23 | Hamlin | Goulding | Lincoln | McIntyre | Calhoun | Newmarch |
| 24 | Boyden | McMaster | Cushman | Adam | Winegar | Larkcom |
| 25 | Haskell | Sullivan | Dunlap | Bruce | Hazen | Marland |
| 26 | Simpkins | Dowse | Carpenter | Dodds | Chaffee | Palfrey |
| 27 | Alden | Rea | Graves | Sproat | Pattee | Higginson |
| 28 | Woodbury | Spelman | Tyler | Gunn | Comstock | Minns |
| 29 | Fish | Blaney | Dunham | Davidson | Shattuck | Tickner |
| 30 | Wilder | Brett | Fisk | Dickson | Bolles | Broad |
